# Supplementary material for: Forecasting the progression of human civilization on the Kardashev Scale through 2060 with a machine learning approach
Source: PubMed Central journal article supplement (PMC10338519; doi:10.1038/s41598-023-38351-y), 2023-07-12
Supplement: 41598_2023_38351_MOESM1_ESM.pdf [file 41598_2023_38351_MOESM1_ESM.pdf]

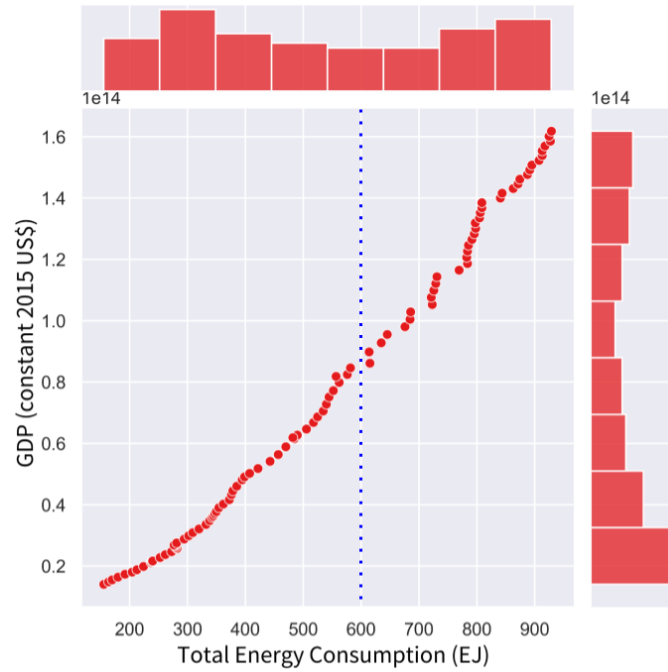

**Supplementary Figure 1. Direct correlation of world's GDP and energy consumption.** The joint plot that describes the correlation of GDP and energy consumption is graphed, where the left of the blue dotted line is historical data, and the right is projected values.

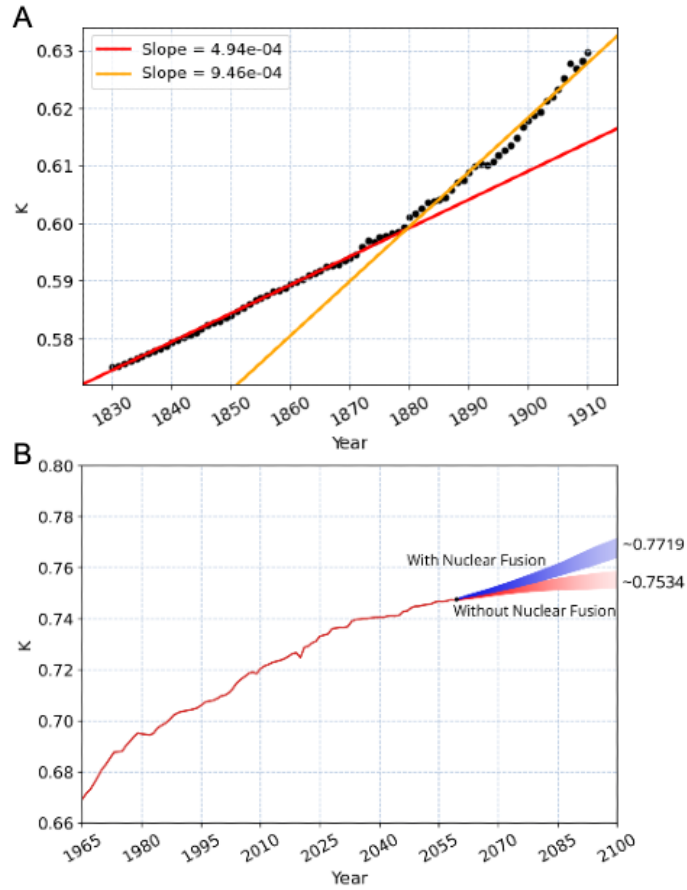

**Supplementary Figure 2. Potential impact of fusion energy.** (A) The trend of K before and after the Second Industrial Revolution. The red and orange lines present the linear regression trending line of K before and after the Second Industrial Revolution, respectively. (B) The trend of the index K under two hypothetical scenarios, with (blue) and without (red) the advent of nuclear fusion in 2060, on mankind's development.

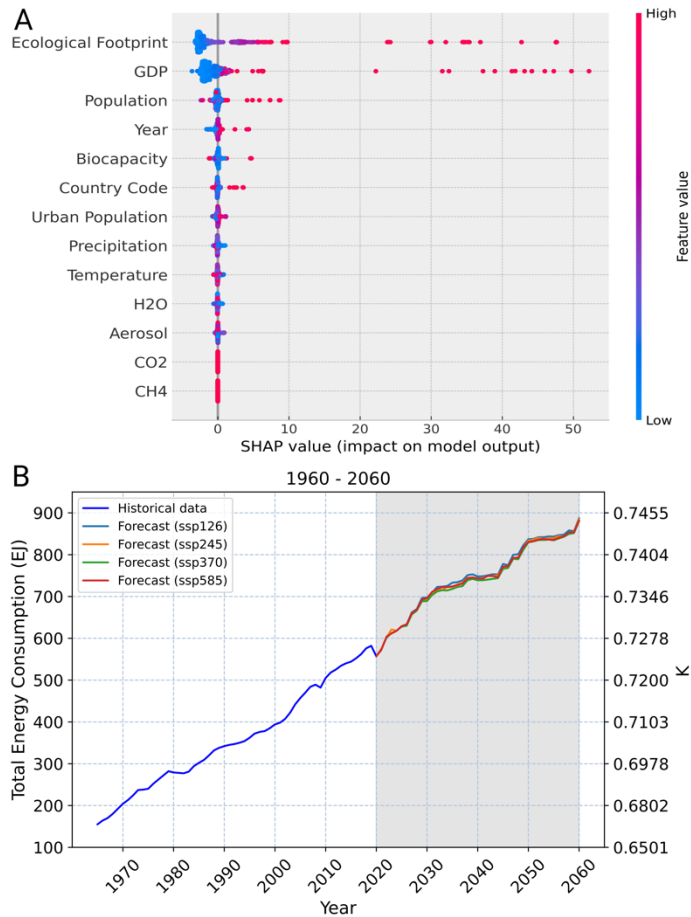

**Supplementary Figure 3. Forecast of energy consumption and index K on the Kardashev Scale with additional impact factors (atmosphere mass content of water vapor, aerosol optical depth at 550nm, carbon dioxide mole fraction, and methane mole fraction) in the model. (A) The selected factors' impacts on the total energy consumption are measured by their SHAP values. The color of each individual dot represents the value of that feature. (B) Historical data and prediction.**

| Year | Projected Values        |        |        |        |         |                       |
|------|-------------------------|--------|--------|--------|---------|-----------------------|
|      | Energy Consumption (EJ) |        |        |        | K       |                       |
|      | SSP126                  | SSP245 | SSP370 | SSP585 | Value   | Annual Growth Rate    |
| 2025 | 643.96                  | 643.61 | 644.39 | 643.44 | 0.73101 | $4.69 \times 10^{-3}$ |
| 2030 | 702.96                  | 702.98 | 702.52 | 702.58 | 0.73481 | $5.20 \times 10^{-3}$ |
| 2035 | 731.15                  | 731.14 | 731.19 | 731.07 | 0.73652 | $2.33 \times 10^{-3}$ |
| 2040 | 756.97                  | 755.43 | 755.43 | 756.91 | 0.73803 | $2.05 \times 10^{-3}$ |
| 2045 | 774.31                  | 775.25 | 775.46 | 775.24 | 0.73901 | $1.33 \times 10^{-3}$ |
| 2050 | 836.22                  | 836.53 | 836.74 | 838.37 | 0.74235 | $4.52 \times 10^{-3}$ |
| 2055 | 839.86                  | 840.74 | 841.56 | 839.84 | 0.74254 | $2.56 \times 10^{-4}$ |
| 2060 | 879.43                  | 878.70 | 879.82 | 881.20 | 0.74454 | $2.69 \times 10^{-3}$ |

**Supplementary Table 1. Forecasting results with additional impact factors (atmosphere mass content of water vapor, aerosol optical depth at 550nm, carbon dioxide mole fraction, and methane mole fraction) in the model.** The predicted value for energy consumption under four different presumed shared socioeconomic pathway scenarios, civilization development index K, as well as its growth rate from 2021 to 2060.

| Parameter                              | Source          |                                                               |
|----------------------------------------|-----------------|---------------------------------------------------------------|
|                                        | Training        | Forecasting                                                   |
| Energy Consumption                     | bp Global       | /                                                             |
| GDP                                    |                 | Organization for Economic Co-operation and Development (OECD) |
| Population                             | World Bank      |                                                               |
| Urban Population                       |                 | United Nation (UN)                                            |
| Ecological Footprint                   |                 |                                                               |
| Biocapacity                            | York University | ARIMA Forecasting                                             |
| Temperature                            |                 |                                                               |
| Precipitation                          |                 |                                                               |
| Atmosphere Mass Content of Water Vapor |                 |                                                               |
| Aerosol Optical Depth (500nm)          |                 | Coupled Model Inter-comparison Project Phase 6 (CMIP 6)       |
| Carbon Dioxide Mole Fraction           |                 |                                                               |
| Methane Mole Fraction                  |                 |                                                               |

**Supplementary Table 2. Data sources.**
